# Supplementary material for: Supramolecular assembly of the beta-catenin destruction complex and the effect of Wnt signaling on its localization, molecular size, and activity in vivo
Source: PLoS Genet. 2018 Apr 11;14(4):e1007339. doi: 10.1371/journal.pgen.1007339 (PMC5912785; doi:10.1371/journal.pgen.1007339)
Supplement: S5 Table — Arm accumulation levels in Wg-expressing stripes versus Arm levels in the interstripes for the indicated genotypes as in S2 Fig B. These are the raw data used to create the box-and-whisker plots in the Figures. n = number of embryos examined. (XLSX) [file pgen.1007339.s013.xlsx]

## Sheet: Sheet1
	S5 Table: Effects on Arm levels of elevating Axin and/or APC2 levels
	Abbrev. Genotype	Category	Mean	Std. Dev.	Minimum	25th Percentile	Median	75th Percentile	Maximum	n=
	Wildtype	Wg Stripe	189502	57641	115308	144436	165122	241961	278825	10
	(act5cGAL4/Cyo)	Interstripe	121351	37219	71619	96433	108979	151905	189887	10
	Mat Axin	Wg Stripe	128196	40878	79708	94402	122544	146699	228161	11
		Interstripe	110603	23538	78025	90643	103552	131697	143606	11
	Wildtype	Wg Stripe	64909	12683	46595	56127	63731	72185	95562	21
	(act5cGAL4/Cyo)	Interstripe	48737	11239	34593	38754	47431	53488	80570	21
	Mat RFP & Axin	Wg Stripe	59219	15569	31098	46050	64029	72824	80381	13
	Lower GFP	Interstripe	45967	12967	26661	36118	46419	59746	64117	13
	Mat RFP & Axin	Wg Stripe	39758	7491	30852	33473	38051	46225	54182	10
	Higher GFP	Interstripe	36796	5180	27238	33647	36800	42773	43351	10
	Wildtype	Wg Stripe	239631	57740	138431	209218	229983	280509	333401	11
	(act5cGAL4/Cyo)	Interstripe	159690	49143	91128	126440	150837	180870	247271	11
	Mat APC2	Wg Stripe	318561	58230	253471	265841	309908	372713	435928	11
		Interstripe	187333	33560	145382	159956	181812	201144	265900	11
	Wildtype	Wg Stripe	204637	45223	79176	173770	207570	234588	288438	36
	(act5cGAL4/Cyo)	Interstripe	135451	32366	58278	112824	129429	152718	220457	36
	Mat APC2 & Axin	Wg Stripe	314265	47598	235343	278999	310783	346017	390044	11
	APC2+; Axin+	Interstripe	163378	24203	119670	140780	167185	180692	198515	11
	Mat APC2 & Axin	Wg Stripe	124596	12761	105843	112659	128190	133803	143265	8
	APC2+; Axin++	Interstripe	98061	14441	76147	87797	97210	111791	118670	8
	Mat APC2 & Axin	Wg Stripe	280121	104100	159805	175731	304371	366095	443029	9
	APC2++; Axin+	Interstripe	154319	55917	76548	93721	152046	203967	226113	9
	Mat APC2 & Axin	Wg Stripe	143706	32493	93466	114848	155752	164689	197860	12
	APC2++; Axin++	Interstripe	121121	25701	81880	94435	125967	143678	154060	12
	Wildtype	Wg Stripe	921.6	141.8	702	782.8	973.5	1035	1053	5
	(y w)	Interstripe	717.7	118.4	510.9	618.1	779.1	786.6	787.7	5
	APC2Δ15Δ20	Wg Stripe	1460	209.3	1180	1301	1434	1630	1766	5
		Interstripe	591.2	85.5	520.7	526.2	534.2	684.6	686.8	5
